# Supplementary material for: Disease-related mutations predicted to impact protein function
Source: PubMed Central journal article supplement (PMC3394413; doi:10.1186/1471-2164-13-s4-s11), 2012-06-18

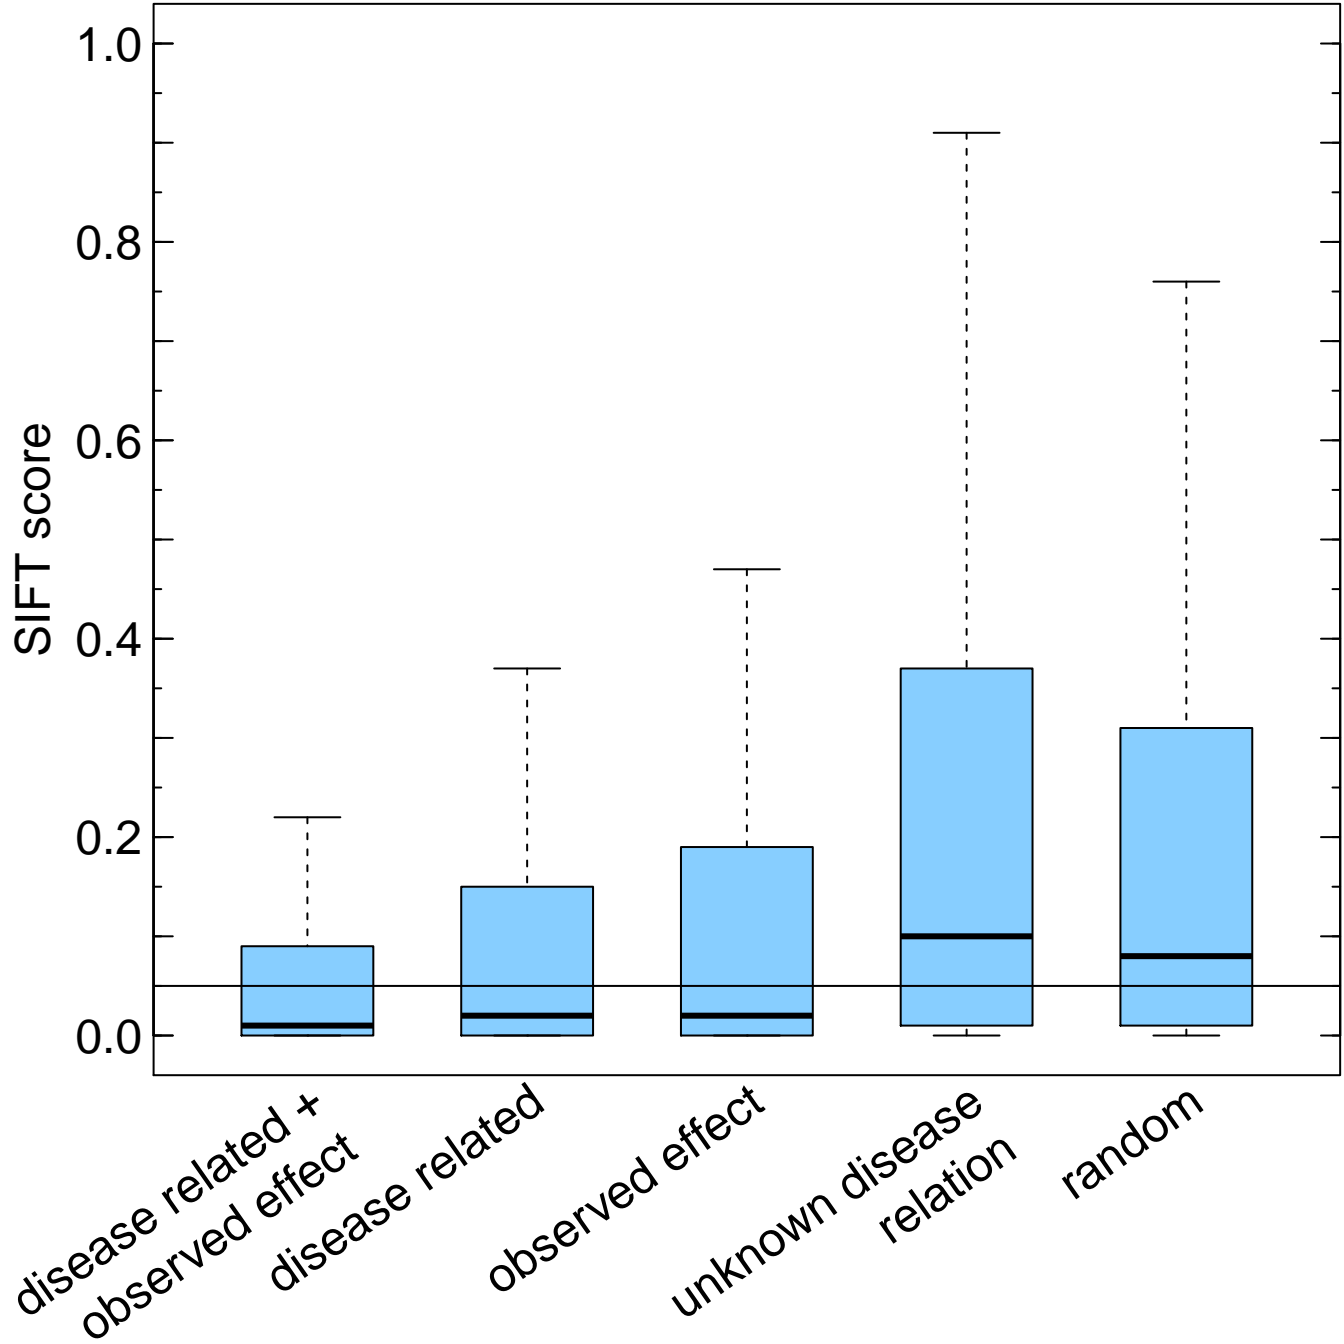

Supplement: 1471-2164-13-S4-S11-S1.pdf [file 1471-2164-13-S4-S11-S1.pdf]
